# Supplementary material for: Effects of different exercise interventions on inhibitory control in overweight and obese children and adolescents: a systematic review and network meta-analysis
Source: Research Square preprint supplement (doi:10.21203/rs.3.rs-6729483/v1), 2025-07-15

**Effects of Different Exercise Interventions on Inhibitory Control in Overweight and Obese Children and Adolescents: A systematic review and network meta-analysis**

Contents

[Appendix A PRISMA checklist 2](#_Toc12439)

[Appendix A1 PRISMA 2020 checklist 2](#_Toc3137)

[Appendix A2 PRISMA NMA Checklist 5](#_Toc26323)

[Appendix B Search strategy 9](#_Toc24092)

[Appendix C Risk of bias assessment of included studies 16](#_Toc4719)

[Appendix DResults of Egger's tests 17](#_Toc20107)

# **Appendix A** PRISMA checklist

## **Appendix A1** PRISMA 2020 checklist

| **Section and Topic** | **Item #** | **Checklist item** | **Location where item is reported** |
| --- | --- | --- | --- |
| **TITLE** | | |  |
| Title | 1 | Identify the report as a systematic review. | Page 1 |
| **ABSTRACT** | | |  |
| Abstract | 2 | See the PRISMA 2020 for Abstracts checklist. | Page 2-3 |
| **INTRODUCTION** | | |  |
| Rationale | 3 | Describe the rationale for the review in the context of existing knowledge. | Page 6 |
| Objectives | 4 | Provide an explicit statement of the objective(s) or question(s) the review addresses. | Page 6 |
| **METHODS** | | |  |
| Eligibility criteria | 5 | Specify the inclusion and exclusion criteria for the review and how studies were grouped for the syntheses. | Page 8-9 |
| Information sources | 6 | Specify all databases, registers, websites, organisations, reference lists and other sources searched or consulted to identify studies. Specify the date when each source was last searched or consulted. | Page 6-7 |
| Search strategy | 7 | Present the full search strategies for all databases, registers and websites, including any filters and limits used. | Page 6-7 |
| Selection process | 8 | Specify the methods used to decide whether a study met the inclusion criteria of the review, including how many reviewers screened each record and each report retrieved, whether they worked independently, and if applicable, details of automation tools used in the process. | Page 7 |
| Data collection process | 9 | Specify the methods used to collect data from reports, including how many reviewers collected data from each report, whether they worked independently, any processes for obtaining or confirming data from study investigators, and if applicable, details of automation tools used in the process. | Page 7 |
| Data items | 10a | List and define all outcomes for which data were sought. Specify whether all results that were compatible with each outcome domain in each study were sought (e.g. for all measures, time points, analyses), and if not, the methods used to decide which results to collect. | Page 8-9 |
| 10b | List and define all other variables for which data were sought (e.g. participant and intervention characteristics, funding sources). Describe any assumptions made about any missing or unclear information. | Page 9 |
| Study risk of bias assessment | 11 | Specify the methods used to assess risk of bias in the included studies, including details of the tool(s) used, how many reviewers assessed each study and whether they worked independently, and if applicable, details of automation tools used in the process. | Page 9 |
| Effect measures | 12 | Specify for each outcome the effect measure(s) (e.g. risk ratio, mean difference) used in the synthesis or presentation of results. | Page 9 |
| Synthesis methods | 13a | Describe the processes used to decide which studies were eligible for each synthesis (e.g. tabulating the study intervention characteristics and comparing against the planned groups for each synthesis (item #5)). | Page 8-9 |
| 13b | Describe any methods required to prepare the data for presentation or synthesis, such as handling of missing summary statistics, or data conversions. | Page 9 |
| 13c | Describe any methods used to tabulate or visually display results of individual studies and syntheses. | Page 9 |
| 13d | Describe any methods used to synthesize results and provide a rationale for the choice(s). If meta-analysis was performed, describe the model(s), method(s) to identify the presence and extent of statistical heterogeneity, and software package(s) used. | Page 9-10 |
| 13e | Describe any methods used to explore possible causes of heterogeneity among study results (e.g. subgroup analysis, meta-regression). | Page 9-10 |
| 13f | Describe any sensitivity analyses conducted to assess robustness of the synthesized results. | Page 9-10 |
| Reporting bias assessment | 14 | Describe any methods used to assess risk of bias due to missing results in a synthesis (arising from reporting biases). | Page 9 |
| Certainty assessment | 15 | Describe any methods used to assess certainty (or confidence) in the body of evidence for an outcome. | Page 9-10 |
| **RESULTS** | | |  |
| Study selection | 16a | Describe the results of the search and selection process, from the number of records identified in the search to the number of studies included in the review, ideally using a flow diagram. | Page 11-12 |
| 16b | Cite studies that might appear to meet the inclusion criteria, but which were excluded, and explain why they were excluded. | Page 11-12 |
| Study characteristics | 17 | Cite each included study and present its characteristics. | Page 12-13 |
| Risk of bias in studies | 18 | Present assessments of risk of bias for each included study. | Page 13 |
| Results of individual studies | 19 | For all outcomes, present, for each study: (a) summary statistics for each group (where appropriate) and (b) an effect estimate and its precision (e.g. confidence/credible interval), ideally using structured tables or plots. | Page 12-13 |
| Results of syntheses | 20a | For each synthesis, briefly summarise the characteristics and risk of bias among contributing studies. | Page 13 |
| 20b | Present results of all statistical syntheses conducted. If meta-analysis was done, present for each the summary estimate and its precision (e.g. confidence/credible interval) and measures of statistical heterogeneity. If comparing groups, describe the direction of the effect. | Page 13-15 |
| 20c | Present results of all investigations of possible causes of heterogeneity among study results. | Page 13-15 |
| 20d | Present results of all sensitivity analyses conducted to assess the robustness of the synthesized results. | Page 15-16 |
| Reporting biases | 21 | Present assessments of risk of bias due to missing results (arising from reporting biases) for each synthesis assessed. | Page 15-16 |
| Certainty of evidence | 22 | Present assessments of certainty (or confidence) in the body of evidence for each outcome assessed. | Page 13 |
| **DISCUSSION** | | |  |
| Discussion | 23a | Provide a general interpretation of the results in the context of other evidence. | Page 16-22 |
| 23b | Discuss any limitations of the evidence included in the review. | Page 23-24 |
| 23c | Discuss any limitations of the review processes used. | Page 23-24 |
| 23d | Discuss implications of the results for practice, policy, and future research. | Page 23-24 |
| **OTHER INFORMATION** | | |  |
| Registration and protocol | 24a | Provide registration information for the review, including register name and registration number, or state that the review was not registered. | Page 6 |
| 24b | Indicate where the review protocol can be accessed, or state that a protocol was not prepared. | Page 6 |
| 24c | Describe and explain any amendments to information provided at registration or in the protocol. | Page 6 |
| Support | 25 | Describe sources of financial or non-financial support for the review, and the role of the funders or sponsors in the review. | Page 25 |
| Competing interests | 26 | Declare any competing interests of review authors. | Page 25 |
| Availability of data, code and other materials | 27 | Report which of the following are publicly available and where they can be found: template data collection forms; data extracted from included studies; data used for all analyses; analytic code; any other materials used in the review. | Page 25 |

## **Appendix A2** PRISMA NMA Checklist

| **Section/Topic** | **Item #** | **Checklist Item** | **Reported on Page #** |
| --- | --- | --- | --- |
| **TITLE** |  |  |  |
| Title | 1 | Identify the report as a systematic review *incorporating a network meta-analysis (or related form of meta-analysis).* | 1 |
|  |  |  |  |
| **ABSTRACT** |  |  |  |
| Structured summary | 2 | Provide a structured summary including, as applicable:  **Background:** main objectives  **Methods:** data sources; study eligibility criteria, participants, and interventions; study appraisal; and *synthesis methods, such as network meta-analysis.*  **Results:** number of studies and participants identified; summary estimates with corresponding confidence/credible intervals; *treatment rankings may also be discussed. Authors may choose to summarize pairwise comparisons against a chosen treatment included in their analyses for brevity.*  **Discussion/Conclusions:** limitations; conclusions and implications of findings.  **Other:** primary source of funding; systematic review registration number with registry name. | 2-3 |
|  |  |  |  |
| **INTRODUCTION** |  |  |  |
| Rationale | 3 | Describe the rationale for the review in the context of what is already known*, including mention of why a network meta-analysis has been conducted.* | 4-6 |
| Objectives | 4 | Provide an explicit statement of questions being addressed, with reference to participants, interventions, comparisons, outcomes, and study design (PICOS). | 6 |
|  |  |  |  |
| **METHODS** |  |  |  |
| Protocol and registration | 5 | Indicate whether a review protocol exists and if and where it can be accessed (e.g., Web address); and, if available, provide registration information, including registration number. | 6 |
| Eligibility criteria | 6 | Specify study characteristics (e.g., PICOS, length of follow-up) and report characteristics (e.g., years considered, language, publication status) used as criteria for eligibility, giving rationale. *Clearly describe eligible treatments included in the treatment network, and note whether any have been clustered or merged into the same node (with justification).* | 6-7 |
| Information sources | 7 | Describe all information sources (e.g., databases with dates of coverage, contact with study authors to identify additional studies) in the search and date last searched. | 6-7 |
| Search | 8 | Present full electronic search strategy for at least one database, including any limits used, such that it could be repeated. | 6-7 |
| Study selection | 9 | State the process for selecting studies (i.e., screening, eligibility, included in systematic review, and, if applicable, included in the meta-analysis). | 8-9 |
| Data collection process | 10 | Describe method of data extraction from reports (e.g., piloted forms, independently, in duplicate) and any processes for obtaining and confirming data from investigators. | 9 |
| Data items | 11 | List and define all variables for which data were sought (e.g., PICOS, funding sources) and any assumptions and simplifications made. | 9 |
| **Geometry of the network** | **S1** | Describe methods used to explore the geometry of the treatment network under study and potential biases related to it. This should include how the evidence base has been graphically summarized for presentation, and what characteristics were compiled and used to describe the evidence base to readers. | 9 |
| Risk of bias within individual studies | 12 | Describe methods used for assessing risk of bias of individual studies (including specification of whether this was done at the study or outcome level), and how this information is to be used in any data synthesis. | 9 |
| Summary measures | 13 | State the principal summary measures (e.g., risk ratio, difference in means). *Also describe the use of additional summary measures assessed, such as treatment rankings and surface under the cumulative ranking curve (SUCRA) values, as well as modified approaches used to present summary findings from meta-analyses.* | 9-10 |
| Planned methods of analysis | 14 | Describe the methods of handling data and combining results of studies for each network meta-analysis. This should include, but not be limited to:   - *Handling of multi-arm trials;* - *Selection of variance structure;* - *Selection of prior distributions in Bayesian analyses; and* - *Assessment of model fit.* | 9-10 |
| **Assessment of Inconsistency** | **S2** | Describe the statistical methods used to evaluate the agreement of direct and indirect evidence in the treatment network(s) studied. Describe efforts taken to address its presence when found. | 9-10 |
| Risk of bias across studies | 15 | Specify any assessment of risk of bias that may affect the cumulative evidence (e.g., publication bias, selective reporting within studies). | 9 |
| Additional analyses | 16 | Describe methods of additional analyses if done, indicating which were pre-specified. This may include, but not be limited to, the following:   - Sensitivity or subgroup analyses; - Meta-regression analyses; - *Alternative formulations of the treatment network; and* - *Use of alternative prior distributions for Bayesian analyses (if applicable).* | 9-10 |
|  |  |  |  |
| **RESULTS** |  |  |  |
| Study selection | 17 | Give numbers of studies screened, assessed for eligibility, and included in the review, with reasons for exclusions at each stage, ideally with a flow diagram. | 11-12 |
| **Presentation of network structure** | **S3** | Provide a network graph of the included studies to enable visualization of the geometry of the treatment network. | 13-15 |
| **Summary of network geometry** | **S4** | Provide a brief overview of characteristics of the treatment network. This may include commentary on the abundance of trials and randomized patients for the different interventions and pairwise comparisons in the network, gaps of evidence in the treatment network, and potential biases reflected by the network structure. | 13-15 |
| Study characteristics | 18 | For each study, present characteristics for which data were extracted (e.g., study size, PICOS, follow-up period) and provide the citations. | 12-13 |
| Risk of bias within studies | 19 | Present data on risk of bias of each study and, if available, any outcome level assessment. | 13 |
| Results of individual studies | 20 | For all outcomes considered (benefits or harms), present, for each study: 1) simple summary data for each intervention group, and 2) effect estimates and confidence intervals. *Modified approaches may be needed to deal with information from larger networks.* | 12-13 |
| Synthesis of results | 21 | Present results of each meta-analysis done, including confidence/credible intervals. *In larger networks, authors may focus on comparisons versus a particular comparator (e.g. placebo or standard care), with full findings presented in an appendix. League tables and forest plots may be considered to summarize pairwise comparisons.* If additional summary measures were explored (such as treatment rankings), these should also be presented. | 13-15 |
| **Exploration for inconsistency** | **S5** | Describe results from investigations of inconsistency. This may include such information as measures of model fit to compare consistency and inconsistency models, *P* values from statistical tests, or summary of inconsistency estimates from different parts of the treatment network. | 15-16 |
| Risk of bias across studies | 22 | Present results of any assessment of risk of bias across studies for the evidence base being studied. | 15-16 |
| Results of additional analyses | 23 | Give results of additional analyses, if done (e.g., sensitivity or subgroup analyses, meta-regression analyses*, alternative network geometries studied, alternative choice of prior distributions for Bayesian analyses,* and so forth). | 15-16 |
|  |  |  |  |
| **DISCUSSION** |  |  |  |
| Summary of evidence | 24 | Summarize the main findings, including the strength of evidence for each main outcome; consider their relevance to key groups (e.g., healthcare providers, users, and policy-makers). | 16-22 |
| Limitations | 25 | Discuss limitations at study and outcome level (e.g., risk of bias), and at review level (e.g., incomplete retrieval of identified research, reporting bias). *Comment on the validity of the assumptions, such as transitivity and consistency. Comment on any concerns regarding network geometry (e.g., avoidance of certain comparisons).* | 23-24 |
| Conclusions | 26 | Provide a general interpretation of the results in the context of other evidence, and implications for future research. | 24 |
|  |  |  |  |
| **FUNDING** |  |  |  |
| Funding | 27 | Describe sources of funding for the systematic review and other support (e.g., supply of data); role of funders for the systematic review. This should also include information regarding whether funding has been received from manufacturers of treatments in the network and/or whether some of the authors are content experts with professional conflicts of interest that could affect use of treatments in the network. | 25 |

# **Appendix B** Search strategy

# **PubMed**

| #1 | "Exercise"[MeSH Terms] | 268962 |
| --- | --- | --- |
| #2 | "exercise"[Title/Abstract] OR "exercises"[Title/Abstract] OR "physical activity"[Title/Abstract] OR "physical activities"[Title/Abstract] OR "sport"[Title/Abstract] OR "taijiquan"[Title/Abstract] OR "dancing"[Title/Abstract] OR "cycling"[Title/Abstract] OR "swimming"[Title/Abstract] OR "jogging"[Title/Abstract] OR "aerobics"[Title/Abstract] OR "training"[Title/Abstract] OR "trainings"[Title/Abstract] OR "walking"[Title/Abstract] OR "Ambulation"[Title/Abstract] OR "qigong"[Title/Abstract] OR "baduanjin"[Title/Abstract] OR "resistance"[Title/Abstract] OR "stair climbing"[Title/Abstract] OR "HIIT"[Title/Abstract] OR "high intensity interval training"[Title/Abstract] OR "plyometric drills"[Title/Abstract] OR "athletics"[Title/Abstract] OR "treadmill"[Title/Abstract] OR "pilates"[Title/Abstract] OR "stretching"[Title/Abstract] OR "physically active"[Title/Abstract] OR "biking"[Title/Abstract] OR "anaerobic"[Title/Abstract] OR "strength training"[Title/Abstract] OR "resistance training"[Title/Abstract] OR "weight training"[Title/Abstract] OR "running"[Title/Abstract] OR "wuqinxi"[Title/Abstract] OR "yijinjing"[Title/Abstract] OR "yoga"[Title/Abstract] OR "ball"[Title/Abstract] OR "soccer"[Title/Abstract] OR "football"[Title/Abstract] OR "basketball"[Title/Abstract] OR "ping pong"[Title/Abstract] OR "Badminton"[Title/Abstract] OR "tennis"[Title/Abstract] OR "baseball"[Title/Abstract] OR "volleyball"[Title/Abstract] OR "softball"[Title/Abstract] OR "racket sport"[Title/Abstract] OR "racquetball"[Title/Abstract] | 2489475 |
| #3 | #1 OR #2 | 2525195 |
| #4 | "Executive Function"[MeSH Terms] | 21840 |
| #5 | "executive function"[Title/Abstract] OR "inhibitory control"[Title/Abstract] OR "executive control"[Title/Abstract] OR "cognitive function"[Title/Abstract] OR "cognition"[Title/Abstract] OR "response inhibition"[Title/Abstract] OR "inhibition"[Title/Abstract] OR "interference control"[Title/Abstract] | 1261679 |
| #6 | #4 OR #5 | 1268871 |
| #7 | "Overweight"[MeSH Terms] | 293284 |
| #8 | "Obesity"[MeSH Terms] | 281353 |
| #9 | "overweight"[Title/Abstract] OR "obesity"[Title/Abstract] OR "obese"[Title/Abstract] OR "excess weight"[Title/Abstract] OR "body mass index"[Title/Abstract] OR "body fat"[Title/Abstract] OR "weight gain"[Title/Abstract] OR "fat accumulation"[Title/Abstract] OR "high body weight"[Title/Abstract] OR "excess body weight"[Title/Abstract] | 695693 |
| #10 | #7 OR #8 OR #9 | 739804 |
| #11 | "Child"[MeSH Terms] | 2256254 |
| #12 | "Adolescent"[MeSH Terms] | 2313594 |
| #13 | "child"[Title/Abstract] OR "children"[Title/Abstract] OR "adolescent"[Title/Abstract] OR "teen"[Title/Abstract] OR "teenager"[Title/Abstract] OR "youth"[Title/Abstract] | 1814422 |
| #14 | #11 OR #12 OR #13 | 4033375 |
| #15 | #3 AND #6 AND #10 AND #14 | 489 |

**Embase**

| #1 | 'exercise'/exp OR 'exercise' | 776678 |
| --- | --- | --- |
| #2 | 'exercise':ab,ti,kw OR 'exercises':ab,ti,kw OR 'physical activity':ab,ti,kw OR 'physical activities':ab,ti,kw OR 'sport':ab,ti,kw OR 'taijiquan':ab,ti,kw OR 'dancing':ab,ti,kw OR 'cycling':ab,ti,kw OR 'swimming':ab,ti,kw OR 'jogging':ab,ti,kw OR 'aerobics':ab,ti,kw OR 'training':ab,ti,kw OR 'trainings':ab,ti,kw OR 'walking':ab,ti,kw OR 'ambulation':ab,ti,kw OR 'qigong':ab,ti,kw OR 'baduanjin':ab,ti,kw OR 'resistance':ab,ti,kw OR 'stair climbing':ab,ti,kw OR 'hiit':ab,ti,kw OR 'high-intensity interval training':ab,ti,kw OR 'plyometric drills':ab,ti,kw OR 'athletics':ab,ti,kw OR 'treadmill':ab,ti,kw OR 'pilates':ab,ti,kw OR 'stretching':ab,ti,kw OR 'physically active':ab,ti,kw OR 'biking':ab,ti,kw OR 'anaerobic':ab,ti,kw OR 'strength training':ab,ti,kw OR 'resistance training':ab,ti,kw OR 'weight training':ab,ti,kw OR 'running':ab,ti,kw OR 'wuqinxi':ab,ti,kw OR 'yijinjing':ab,ti,kw OR 'yoga':ab,ti,kw OR 'ball':ab,ti,kw OR 'soccer':ab,ti,kw OR 'football':ab,ti,kw OR 'basketball':ab,ti,kw OR 'ping pong':ab,ti,kw OR 'badminton':ab,ti,kw OR 'tennis':ab,ti,kw OR 'baseball':ab,ti,kw OR 'volleyball':ab,ti,kw OR 'softball':ab,ti,kw OR 'racket sport':ab,ti,kw OR 'racquetball':ab,ti,kw | 3172973 |
| #3 | #1 OR #2 | 3349425 |
| #4 | 'inhibitory control'/exp OR 'inhibitory control' | 12302 |
| #5 | 'inhibitory control':ab,ti,kw OR 'executive function':ab,ti,kw OR 'executive control':ab,ti,kw OR 'cognitive function':ab,ti,kw OR 'cognition':ab,ti,kw OR 'response inhibition':ab,ti,kw OR 'inhibition':ab,ti,kw OR 'interference control':ab,ti,kw | 1616672 |
| #6 | #4 OR #5 | 1616875 |
| #7 | 'obesity'/exp OR 'obesity' | 887632 |
| #8 | 'overweight':ab,ti,kw OR 'obesity':ab,ti,kw OR 'obese':ab,ti,kw OR 'excess weight':ab,ti,kw OR 'body mass index':ab,ti,kw OR 'body fat':ab,ti,kw OR 'weight gain':ab,ti,kw OR 'fat accumulation':ab,ti,kw OR 'high body weight':ab,ti,kw OR 'excess body weight':ab,ti,kw | 1020643 |
| #9 | #7 OR #8 | 1250172 |
| #10 | 'child'/exp OR 'child' | 4156148 |
| #11 | 'adolescent'/exp OR 'adolescent' | 2216095 |
| #12 | 'child':ab,ti,kw OR 'children':ab,ti,kw OR 'adolescent':ab,ti,kw OR 'teen':ab,ti,kw OR 'teenager':ab,ti,kw OR 'youth':ab,ti,kw | 2376459 |
| #13 | #10 OR #11 OR #12 | 5390903 |
| #14 | #3 AND #6 AND #9 AND #13 | 781 |

**Cochrane**

| #1 | MeSH descriptor: [Exercise] explode all trees | 39411 |
| --- | --- | --- |
| #2 | (exercise or exercises or physical activity or physical activities or sport or taijiquan or dancing or cycling or swimming or jogging or aerobics or training or trainings or walking or Ambulation or qigong or baduanjin or resistance or stair climbing or HIIT or high-intensity interval training or plyometric drills or athletics or treadmill or pilates or stretching or physically active or biking or anaerobic or strength training or resistance training or weight training or running or wuqinxi or yijinjing or yoga or ball or soccer or football or basketball or ping pong or Badminton or tennis or baseball or volleyball or softball or racket sport or racquetball):ti,ab,kw | 353283 |
| #3 | #1 OR #2 | 353314 |
| #4 | MeSH descriptor: [Executive Function] explode all trees | 1880 |
| #5 | (inhibitory control or executive function or executive control or cognitive function or cognition or response inhibition or inhibition or interference control):ti,ab,kw | 187123 |
| #6 | #4 OR #5 | 187123 |
| #7 | MeSH descriptor: [Overweight] explode all trees | 25283 |
| #8 | MeSH descriptor: [Obesity] explode all trees | 21557 |
| #9 | (overweight or obesity or obese or excess weight or body mass index or body fat or weight gain or fat accumulation or high body weight or excess body weight):ti,ab,kw | 136601 |
| #10 | #7 or #8 or #9 | 136676 |
| #11 | MeSH descriptor: [Child] explode all trees | 81439 |
| #12 | MeSH descriptor: [Adolescent] explode all trees | 136760 |
| #13 | (child or children or adolescent or teen or teenager or youth):ti,ab,kw | 311089 |
| #14 | #11 or #12 or #13 | 311089 |
| #15 | #3 and #6 and #10 and #14 | 1050 |

**Web of Science**

| #1 | TS=("exercise" OR "exercises" OR "physical activity" OR "physical activities" OR "sport" OR "taijiquan" OR "dancing" OR "cycling" OR "swimming" OR "jogging" OR "aerobics" OR "training" OR "trainings" OR "walking" OR "Ambulation" OR "qigong" OR "baduanjin" OR "resistance" OR "stair climbing" OR "HIIT" OR "high-intensity interval training" OR "plyometric drills" OR "athletics" OR "treadmill" OR "pilates" OR "stretching" OR "physically active" OR "biking" OR "anaerobic" OR "strength training" OR "resistance training" OR "weight training" OR "running" OR "wuqinxi" OR "yijinjing" OR "yoga" OR "ball" OR "soccer" OR "football" OR "basketball" OR "ping pong" OR "Badminton" OR "tennis" OR "baseball" OR "volleyball" OR "softball" OR "racket sport" OR "racquetball") | 15750984 |
| --- | --- | --- |
| #2 | TS=("inhibitory control" OR "executive function" OR "executive control" OR "cognitive function" OR "cognition" OR "response inhibition" OR "inhibition" OR "interference control") | 2858141 |
| #3 | TS=("overweight" OR "obesity" OR "obese" OR "excess weight" OR "body mass index" OR "body fat" OR "weight gain" OR "fat accumulation" OR "high body weight" OR "excess body weight") | 1536625 |
| #4 | TS=("child" OR "children" OR "adolescent" OR "teen" OR "teenager" OR "youth") | 6543254 |
| #5 | #1 AND #2 AND #3 AND #4 | 2973 |

**ProQuest**

| [S1] | [AB,TI("exercise" OR "exercises" OR "physical activity" OR "physical activities" OR "sport" OR "taijiquan" OR "dancing" OR "cycling" OR "swimming" OR "jogging" OR "aerobics" OR "training" OR "trainings" OR "walking" OR "Ambulation" OR "qigong" OR "baduanjin" OR "resistance" OR "stair climbing" OR "HIIT" OR "high-intensity interval training" OR "plyometric drills" OR "athletics" OR "treadmill" OR "pilates" OR "stretching" OR "physically active" OR "biking" OR "anaerobic" OR "strength training" OR "resistance training" OR "weight training" OR "running" OR "wuqinxi" OR "yijinjing" OR "yoga" OR "ball" OR "soccer" OR "football" OR "basketball" OR "ping pong" OR "Badminton" OR "tennis" OR "baseball" OR "volleyball" OR "softball" OR "racket sport" OR "racquetball")](https://www.proquest.com/recentsearches.recentsearchtabview.recentsearchesgridview.scrolledrecentsearchlist.checkdbssearchlink:rerunsearch/90E7172A156744F3PQ/None/$N?t:ac=RecentSearches) | 3421432 |
| --- | --- | --- |
| [S2] | AB,TI("inhibitory control" OR "executive function" OR "executive control" OR "cognitive function" OR "cognition" OR "response inhibition" OR "inhibition" OR "interference control") | 410686 |
| [S3] | AB,TI("overweight" OR "obesity" OR "obese" OR "excess weight" OR "body mass index" OR "body fat" OR "weight gain" OR "fat accumulation" OR "high body weight" OR "excess body weight") | 282821 |
| [S4] | AB,TI("child" OR "children" OR "adolescent" OR "teen" OR "teenager" OR "youth") | 1909837 |
| [S5] | [S1] AND [S2] AND [S3] AND [S4] | 164 |

CNKI

| #1 | 运动 + 体育锻炼 + 身体活动 + 体育活动 + 太极拳 + 舞蹈 + 骑行 + 游泳 + 慢跑 + 有氧运动 + 训练 + 步行 + 气功 + 八段锦 + 阻力训练 + 抗阻训练 + 爬楼梯 + 高强度间歇训练 + 爆发力训练 + 田径 + 跑步机 + 普拉提 + 拉伸 + 骑车 + 无氧运动 + 力量训练 + 举重训练 + 跑步 + 五禽戏 + 易筋经 + 瑜伽 + 球类运动 + 足球 + 篮球 + 乒乓球 + 羽毛球 + 网球 + 棒球 + 排球 + 垒球 + 球拍运动 + 壁球 | 1800400 |
| --- | --- | --- |
| #2 | 抑制控制 + 干扰控制 + 反应抑制 + 执行功能 + 执行控制 + 认知功能 + 抑制 | 15500 |
| #3 | 超重 + 肥胖 | 128 |
| #4 | 儿童 + 青少年 | 36 |
| #5 | #1 AND #2 AND #3 AND #4 | 36 |

**Wanfang**

| #1 | 题名或关键词:(运动 OR 体育锻炼 OR 身体活动 OR 体育活动 OR 太极拳 OR 舞蹈 OR 骑行 OR 游泳 OR 慢跑 OR 有氧运动 OR 训练 OR 步行 OR 气功 OR 八段锦 OR 阻力训练 OR 抗阻训练 OR 爬楼梯 OR 高强度间歇训练 OR 爆发力训练 OR 田径 OR 跑步机 OR 普拉提 OR 拉伸 OR 骑车 OR 无氧运动 OR 力量训练 OR 举重训练 OR 跑步 OR 五禽戏 OR 易筋经 OR 瑜伽 OR 球类运动 OR 足球 OR 篮球 OR 乒乓球 OR 羽毛球 OR 网球 OR 棒球 OR 排球 OR 垒球 OR 球拍运动 OR 壁球) and 题名或关键词:(抑制控制 OR 干扰控制 OR 反应抑制 OR 执行功能 OR 执行控制 OR 认知功能 OR 抑制) and 题名或关键词:(超重 OR 肥胖) and 题名或关键词:(儿童 OR 青少年) | 343 |
| --- | --- | --- |

**VIP**

| #1 | 运动 or 体育锻炼 or 身体活动 or 体育活动 or 太极拳 or 舞蹈 or 骑行 or 游泳 or 慢跑 or 有氧运动 or 训练 or 步行 or 气功 or 八段锦 or 阻力训练 or 抗阻训练 or 爬楼梯 or 高强度间歇训练 or 爆发力训练 or 田径 or 跑步机 or 普拉提 or 拉伸 or 骑车 or 无氧运动 or 力量训练 or 举重训练 or 跑步 or 五禽戏 or 易筋经 or 瑜伽 or 球类运动 or 足球 or 篮球 or 乒乓球 or 羽毛球 or 网球 or 棒球 or 排球 or 垒球 or 球拍运动 or 壁球 |  |
| --- | --- | --- |
| #2 | 抑制控制 or 干扰控制 or 反应抑制 or 执行功能 or 执行控制 or 认知功能 or 抑制 |  |
| #3 | 超重 or 肥胖 |  |
| #4 | 儿童 or 青少年 |  |
| #5 | #1 AND #2 AND #3 AND #4 | 17 |

#

# **Appendix C** Risk of bias assessment of included studies

**
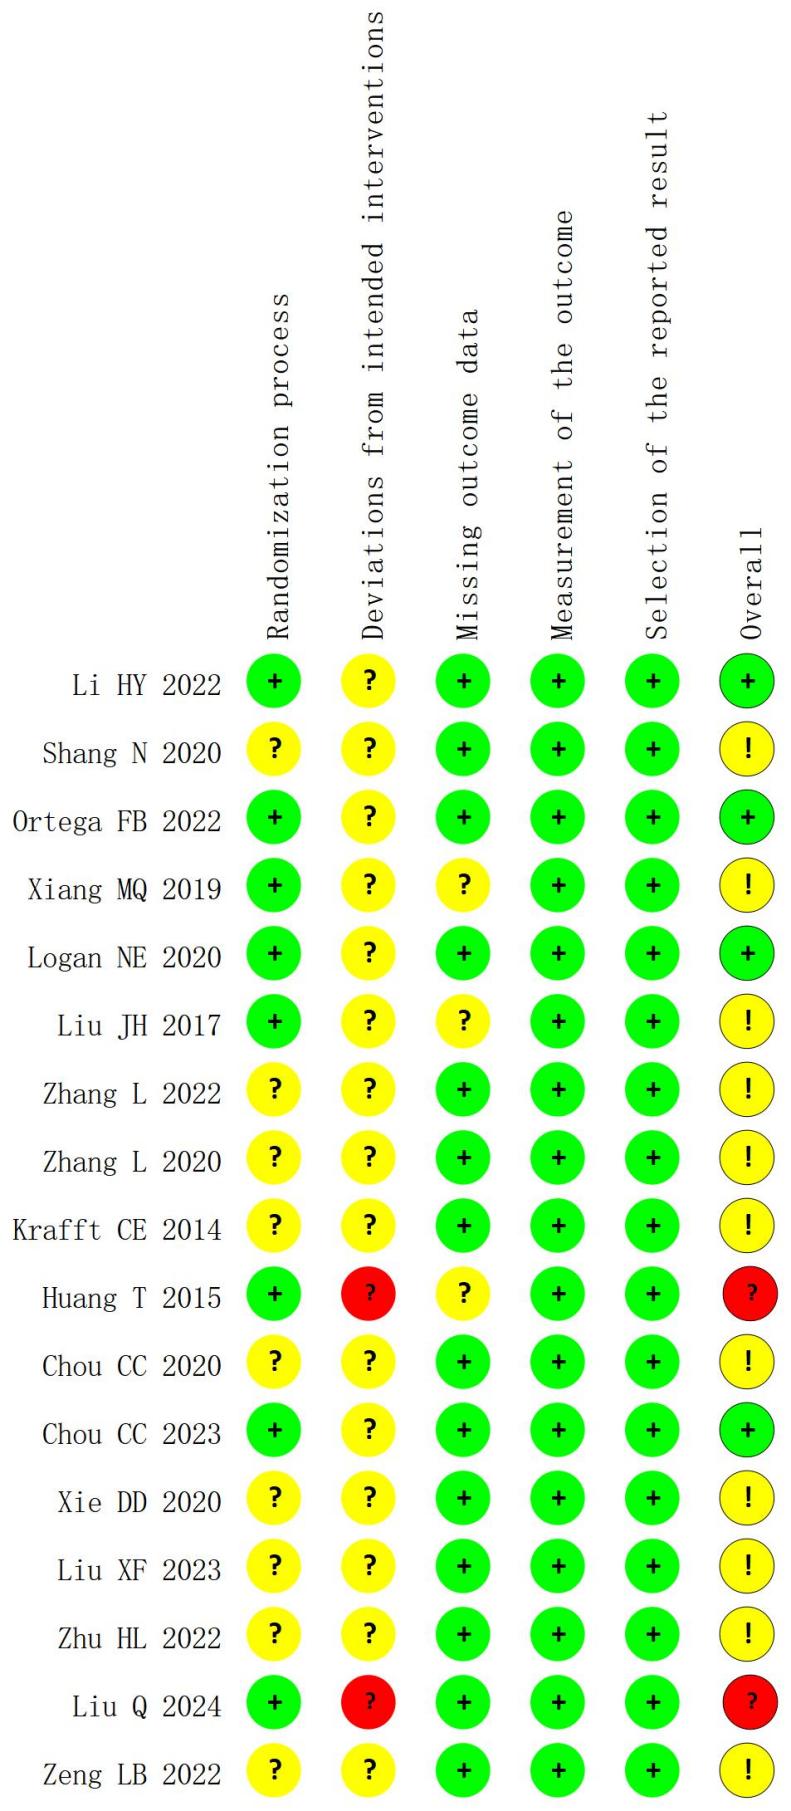
**

# **Appendix E** Results of Egger's tests


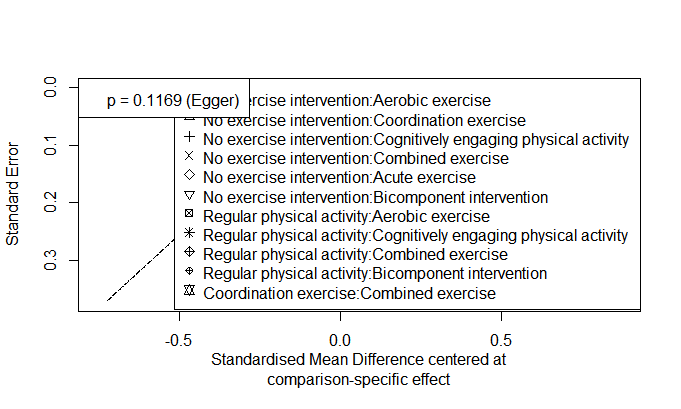

Supplement: Supplementary file 1 [file ea7b1b692cff1147fa4e665b.docx]
